# Supplementary material for: Genetic diversity and demography of Bufo japonicus and B. torrenticola (Amphibia: Anura: Bufonidae) influenced by the Quaternary climate
Source: PeerJ journal article supplement (doi:10.7717/peerj.13452), 2022-06-08

(a)

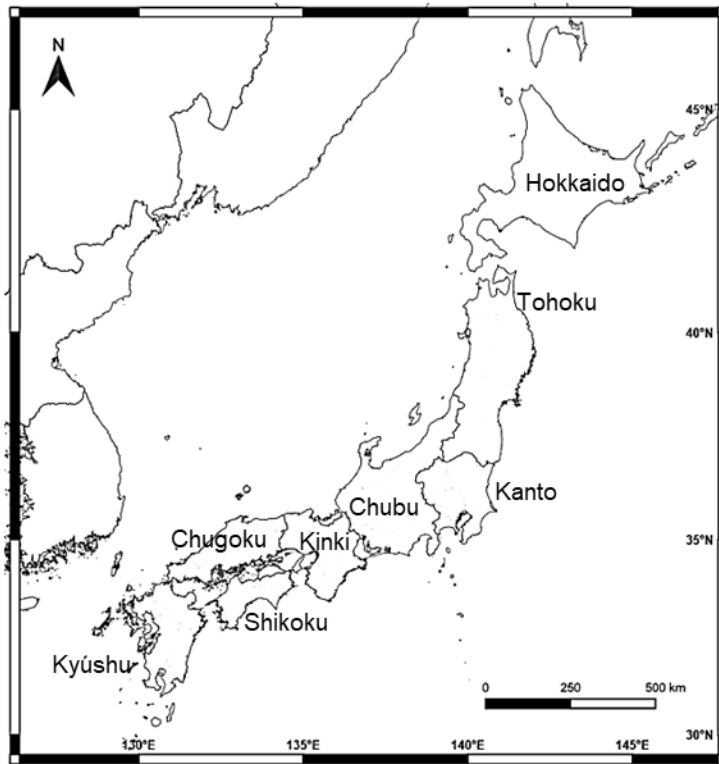

(b)

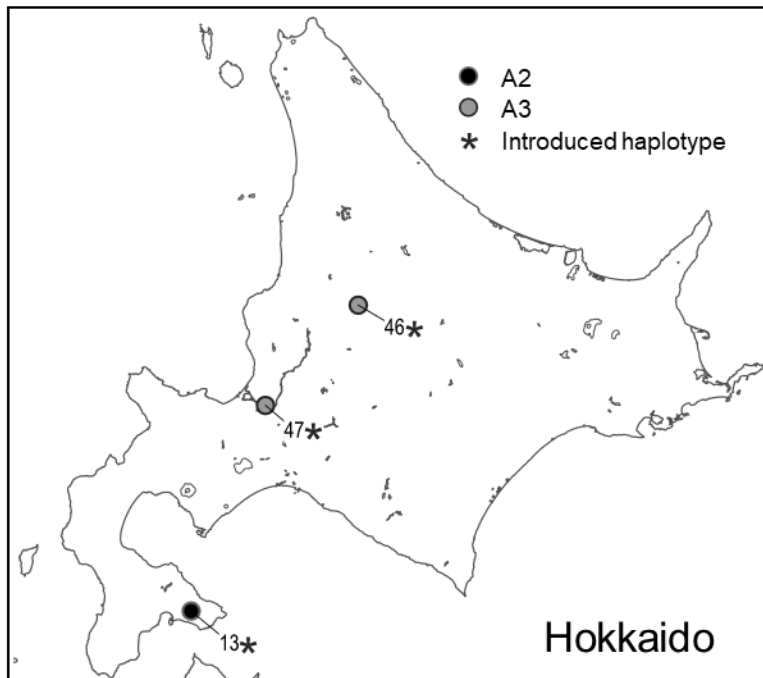

(c)

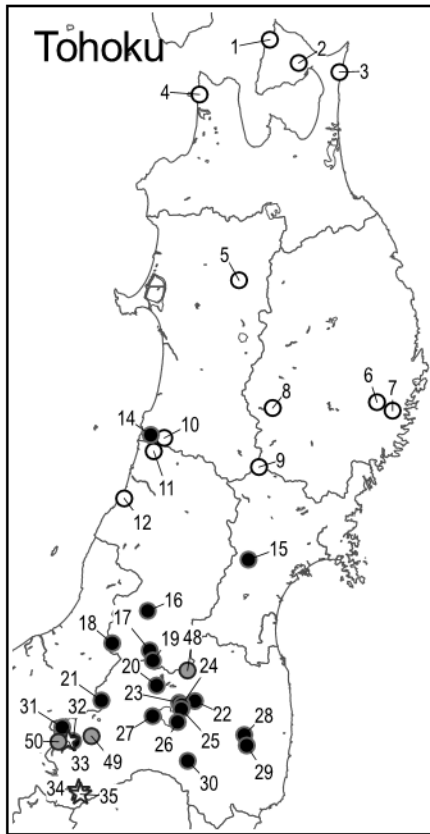

- A1
- A2
- A3
- ▼ B1
- ☆ A2 and A3 (locality 33–35)
- ☆ A3 and B1 (locality 67)
- \* Introduced haplotype

(d)

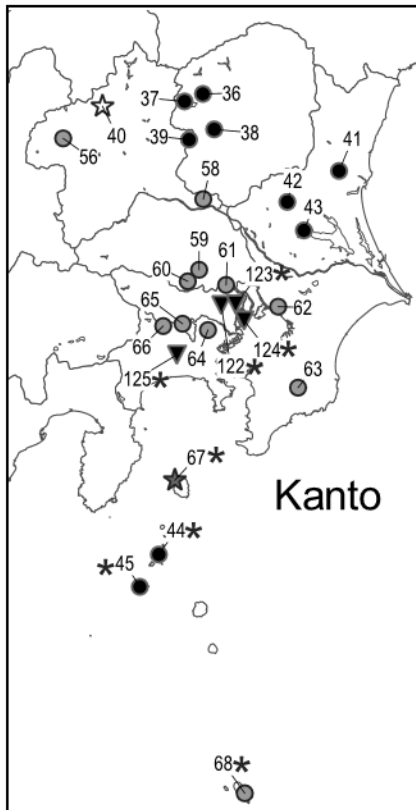

(e)

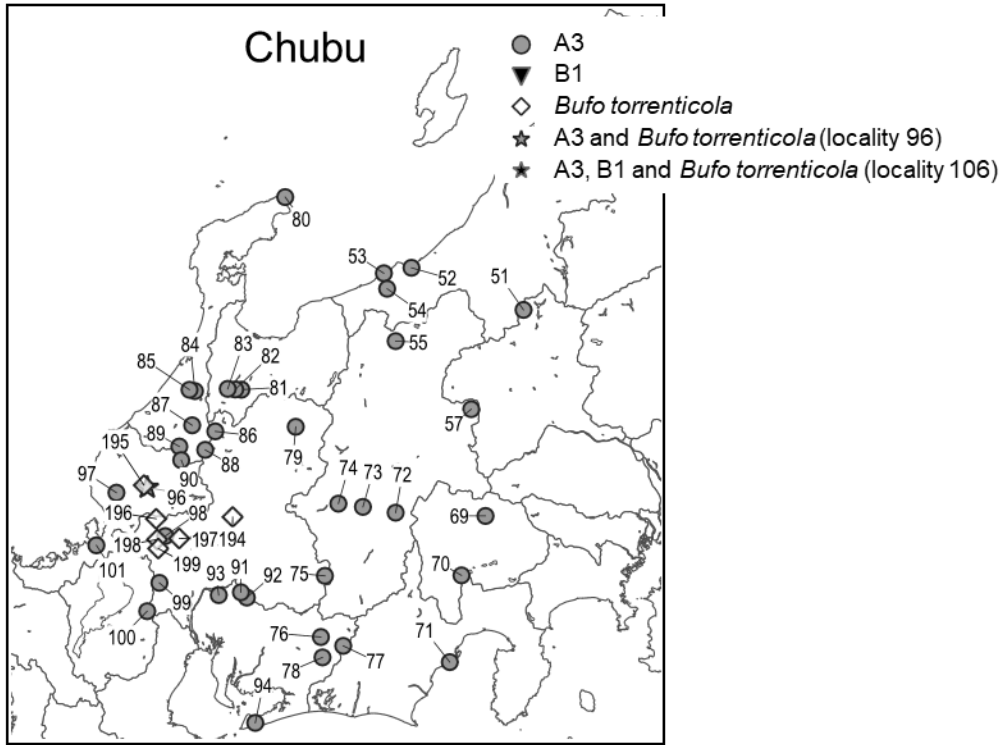

(f)

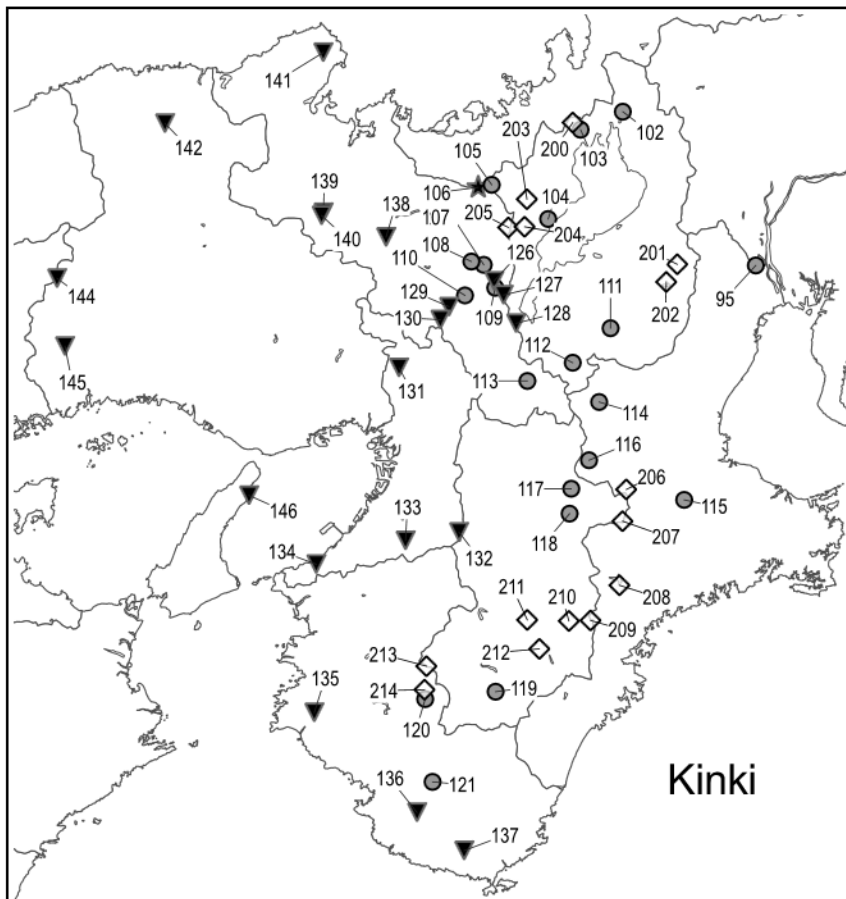

(g)

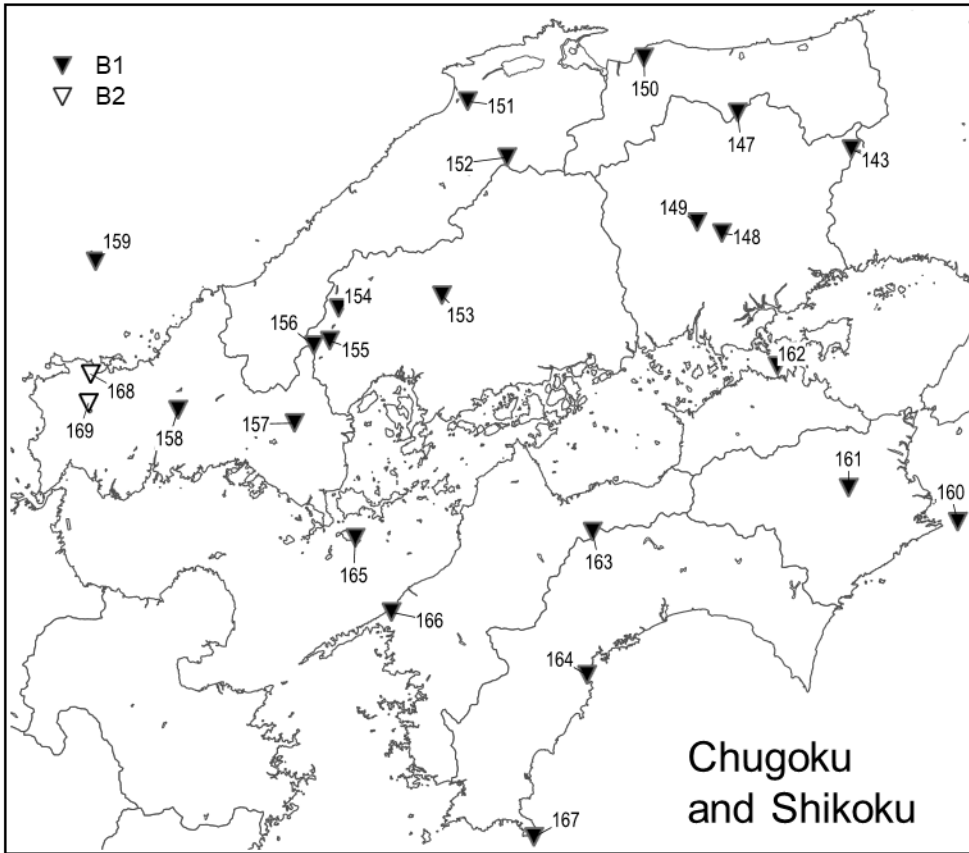

(h)

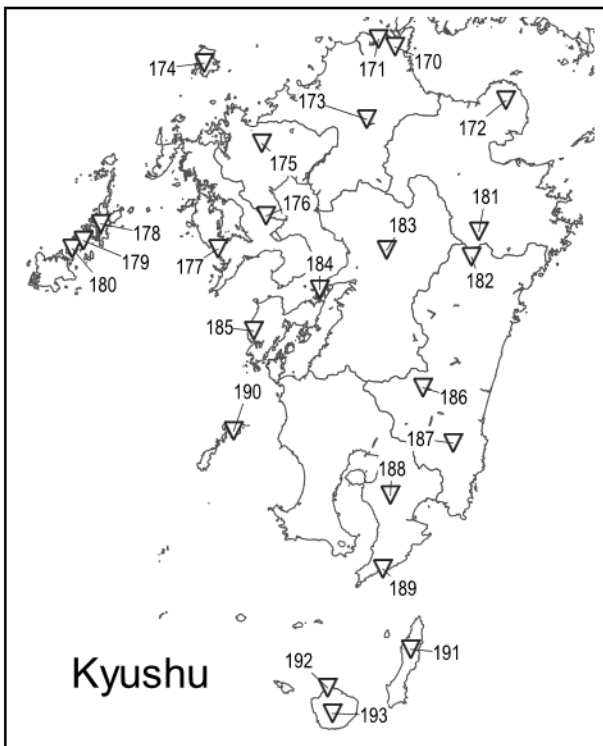

Supplement: Figure_S1.pdf [file Figure_S1.pdf]
