# Supplementary material for: Genetic diversity and demography of Bufo japonicus and B. torrenticola (Amphibia: Anura: Bufonidae) influenced by the Quaternary climate
Source: PeerJ journal article supplement (doi:10.7717/peerj.13452), 2022-06-08

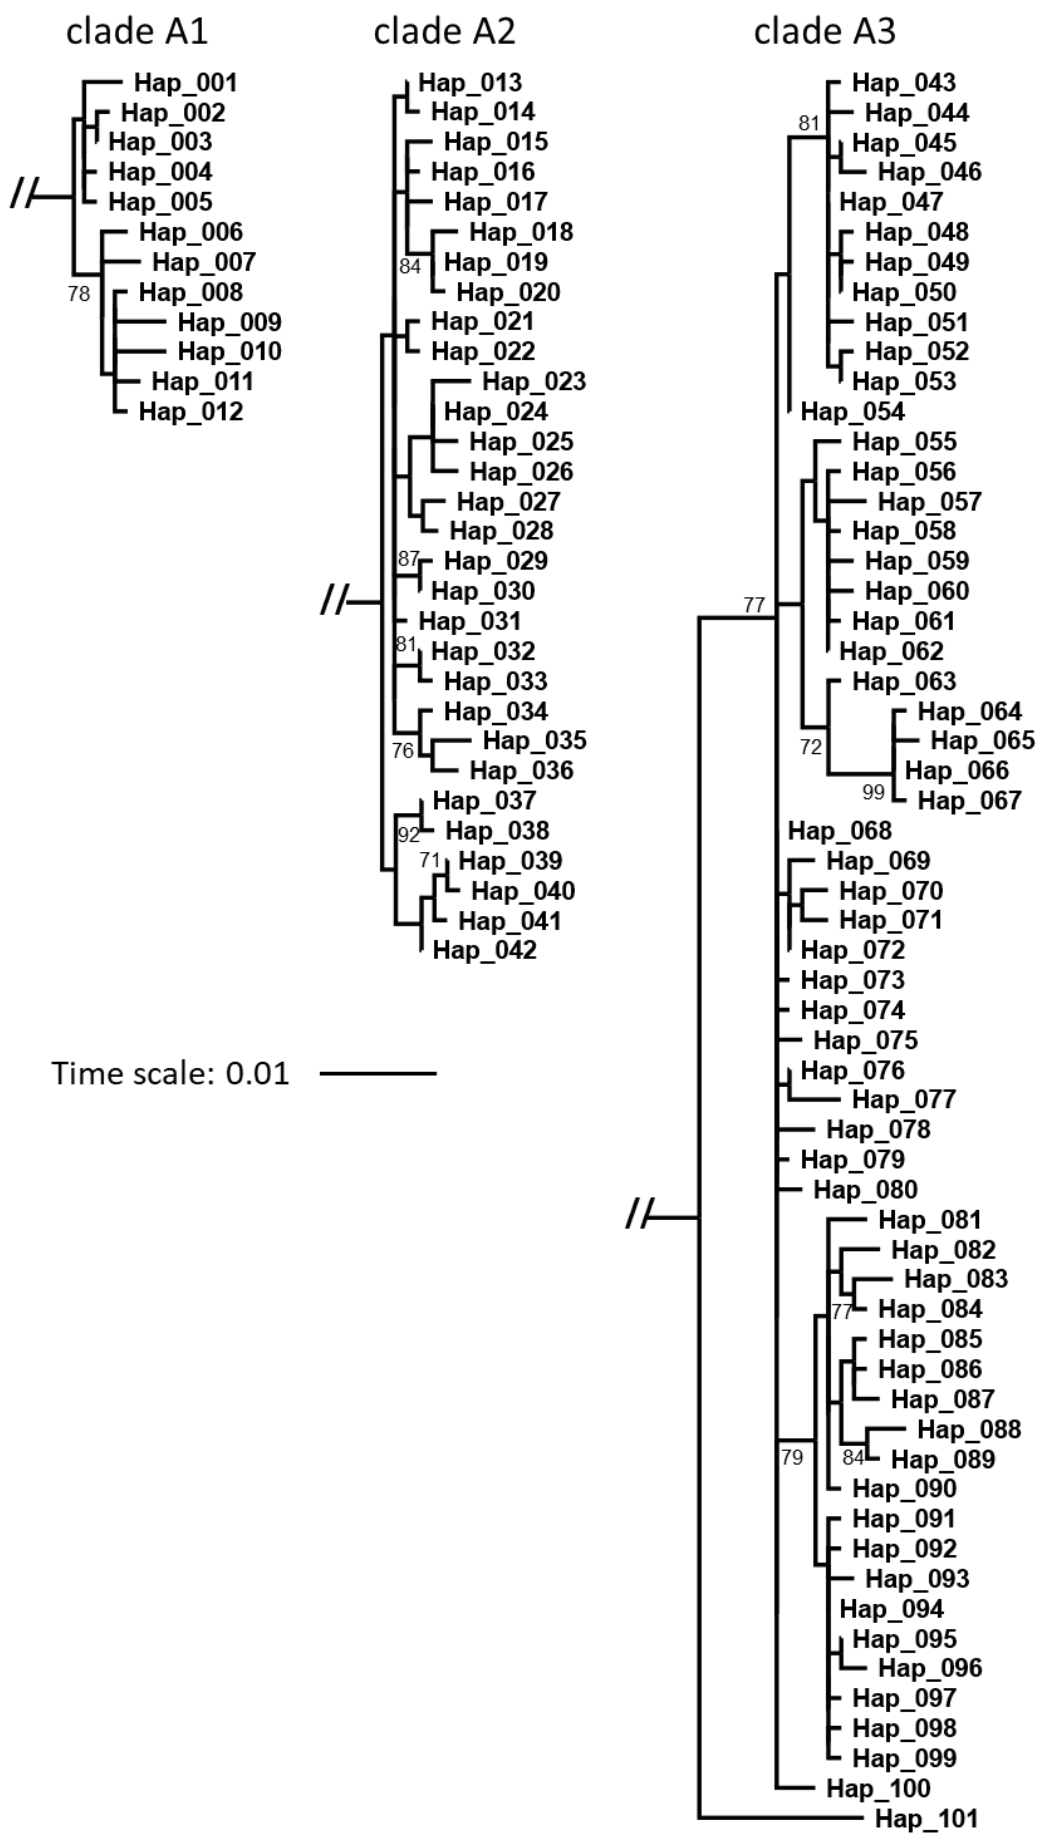

clade B1

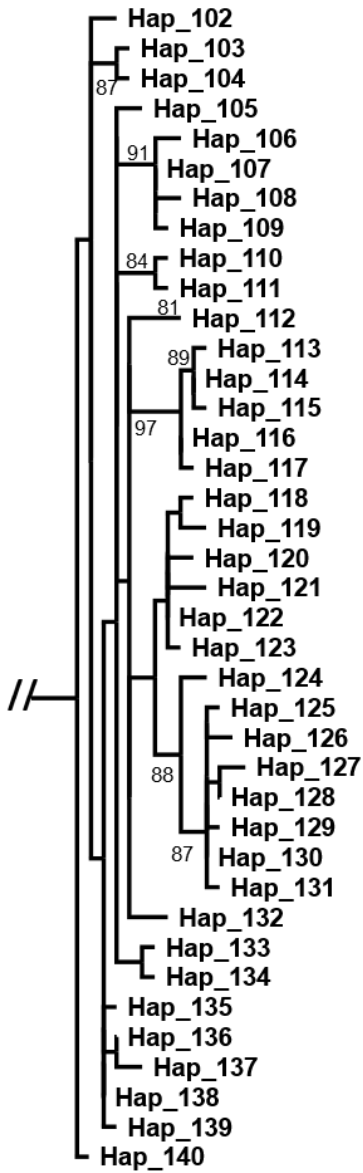

clade B2

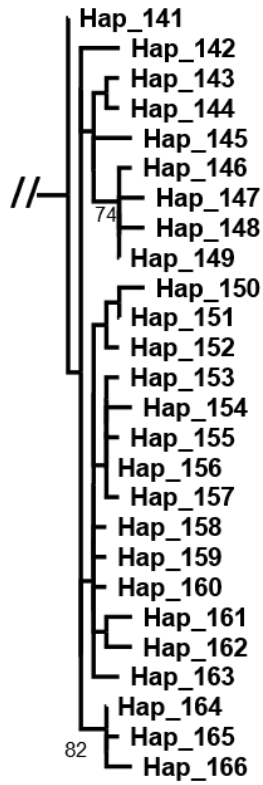

*Bufo torrenticola*

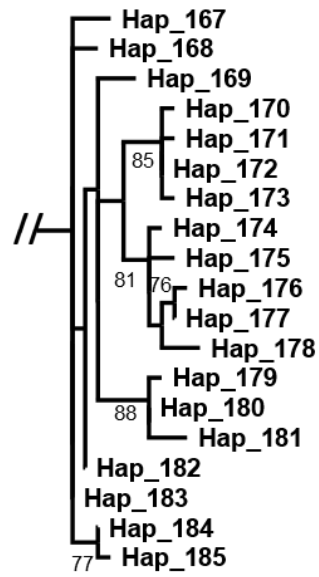

Time scale: 0.01 

Supplement: Figure_S2.pdf [file Figure_S2.pdf]
