# Supplementary material for: Genetic diversity and demography of Bufo japonicus and B. torrenticola (Amphibia: Anura: Bufonidae) influenced by the Quaternary climate
Source: PeerJ journal article supplement (doi:10.7717/peerj.13452), 2022-06-08

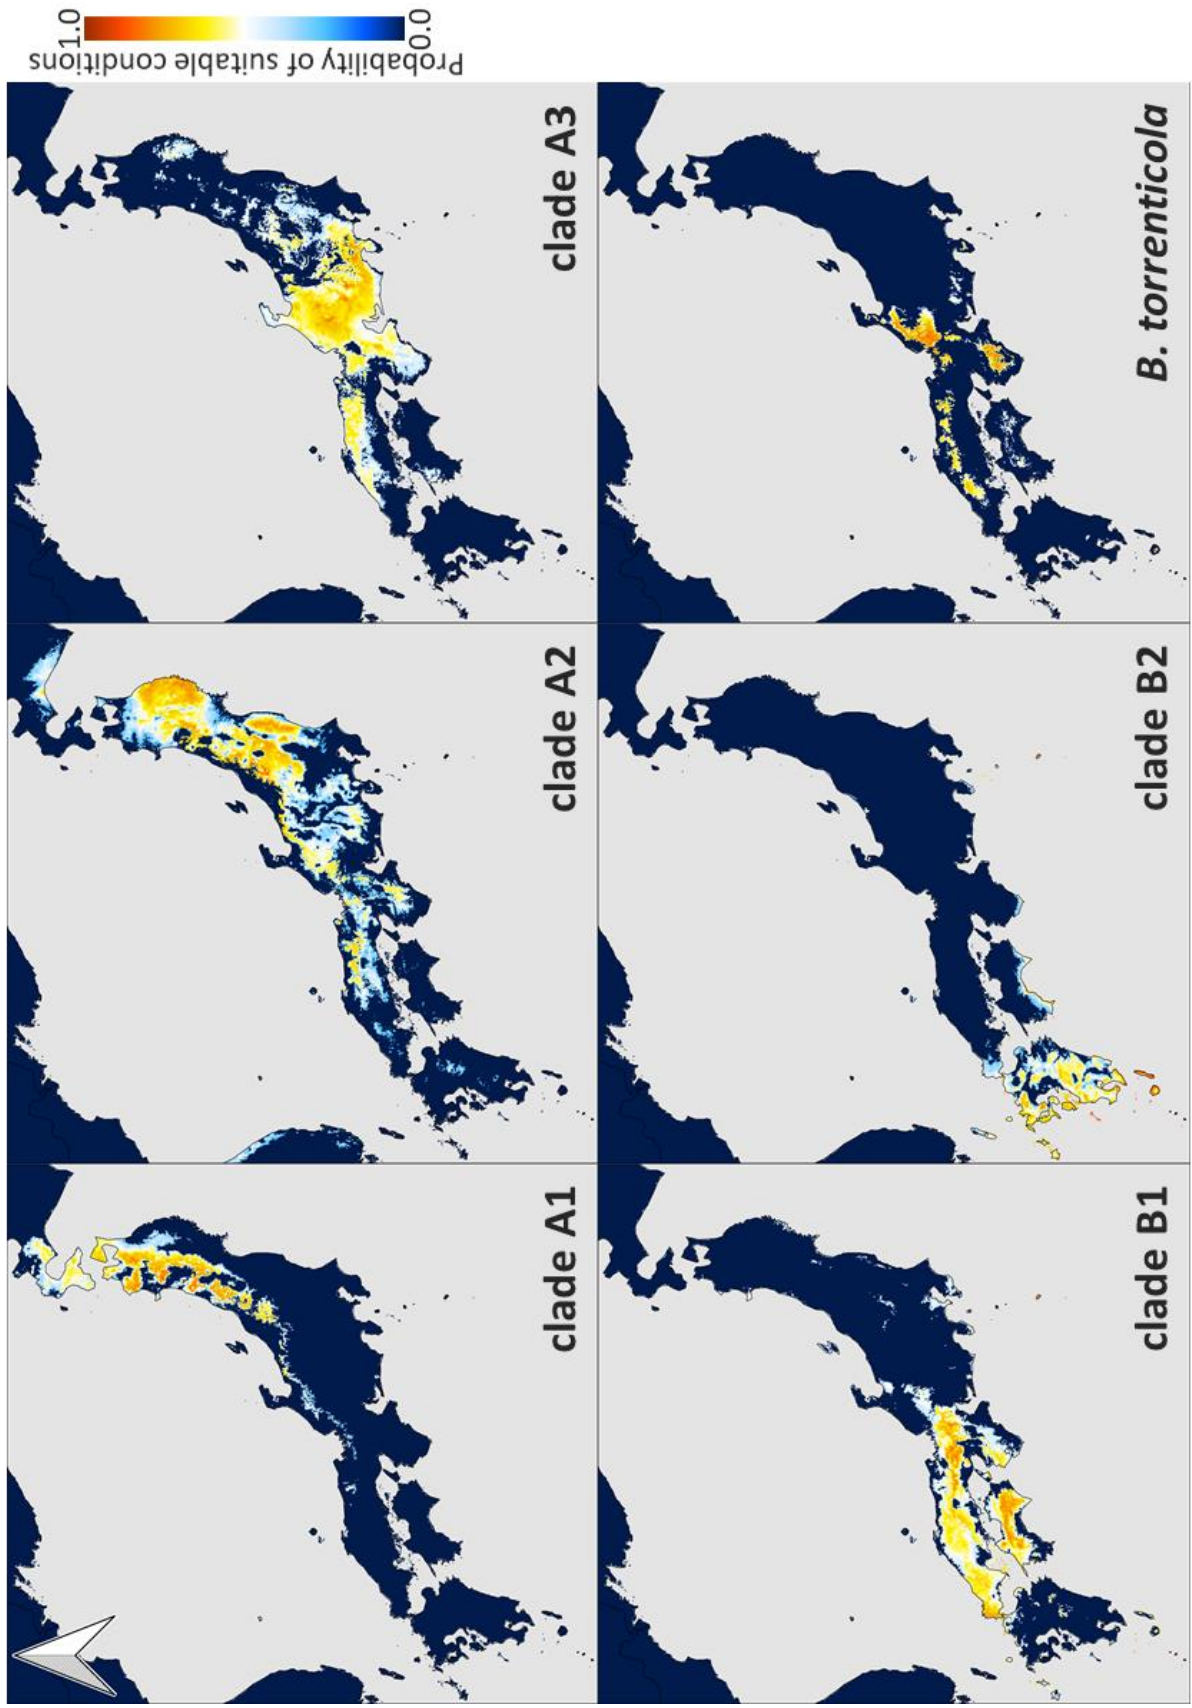

Supplement: Figure_S4_0323.pdf [file Figure_S4_0323.pdf]
