# Supplementary material for: Genetic diversity and demography of Bufo japonicus and B. torrenticola (Amphibia: Anura: Bufonidae) influenced by the Quaternary climate
Source: PeerJ. 2022 Jun 8;10:e13452. doi: 10.7717/peerj.13452 (PMC9188313; doi:10.7717/peerj.13452)
Supplement: Supplemental Information 5 — KUHE, Graduate School of Human and Environmental Studies, Kyoto University; TMP, temporary number. [file peerj-10-13452-s005.xlsx]

## Sheet: Sheet1
Locality No.	Haplotype No. (N of individuals other than 1)	mtDNA clade/species	Voucher (KUHE)	Genbank accession No.	Locality	Prefecture	Region/Country
1	Hap_005	A1	27583	LC581732	Sai	Aomori	Tohoku
2	Hap_003	A1	TMP_20120617	LC581640	Mutsu	Aomori	Tohoku
3	Hap_004	A1	27584	LC581733	Higashidori	Aomori	Tohoku
4	Hap_001	A1	27792	LC581651	Nakadomari	Aomori	Tohoku
5	Hap_006	A1	TMP_T3127	LC581638	Kitaakita	Akita	Tohoku
5	Hap_008	A1	31943	LC581657	Kitaakita	Akita	Tohoku
6	Hap_011	A1	59671	LC581659	Kamaishi	Iwate	Tohoku
7	Hap_002	A1	27748	LC581735	Kamaishi	Iwate	Tohoku
8	Hap_009	A1	TMP_NY499	LC581693	Nishiwaga	Iwate	Tohoku
9	Hap_010 (1)	A1	35275	LC581637	Ichinoseki	Iwate	Tohoku
10	Hap_012	A1	24027	LC581514	Yurihonjo	Akita	Tohoku
11	Hap_007	A1	TMP_NY500	LC581710	Yuza	Yamagata	Tohoku
12	Hap_010 (2)	A1	TMP_NY501	LC581709	Tsuruoka	Yamagata	Tohoku
13	Hap_040 (1)	A2	TMP_NY2924	LC581706	Hakodate	Hokkaido	Hokkaido
13	Hap_040 (2)	A2	59647	LC581707	Hakodate	Hokkaido	Hokkaido
14	Hap_015	A2	43074	LC581658	Nikaho	Akita	Tohoku
15	Hap_016	A2	45519	LC581634	Sendai	Miyagi	Tohoku
16	Hap_019 (1)	A2	43201	LC581635	Nagai	Yamagata	Tohoku
17	Hap_019 (2)	A2	48108	LC581660	Yonezawa	Yamagata	Tohoku
18	Hap_026	A2	TMP_NY2463	LC581708	Oguni	Yamagata	Tohoku
19	Hap_017 (1)	A2	48110	LC581636	Yonezawa	Yamagata	Tohoku
20	Hap_030 (1)	A2	39607	LC581663	Kitashiobara	Fukushima	Tohoku
21	Hap_024	A2	TMP_NY1939	LC581704	Nishiaizu	Fukushima	Tohoku
22	Hap_032	A2	59301	LC581664	Otama	Fukushima	Tohoku
23	Hap_014	A2	49931	LC581713	Inawashiro	Fukushima	Tohoku
24	Hap_022	A2	TMP_NY1195	LC581697	Koriyama	Fukushima	Tohoku
25	Hap_025	A2	43072	LC581662	Koriyama	Fukushima	Tohoku
26	Hap_027	A2	TMP_20130702	LC581686	Koriyama	Fukushima	Tohoku
27	Hap_029	A2	43355	LC581661	Aizuwakamatsu	Fukushima	Tohoku
28	Hap_033	A2	TMP_NY843	LC581703	Tamura	Fukushima	Tohoku
29	Hap_013	A2	TMP_NY2805	LC581696	Iwaki	Fukushima	Tohoku
30	Hap_023	A2	21647	LC581632	Shirakawa	Fukushima	Tohoku
31	Hap_017 (2)	A2	TMP_NY458	LC581699	Tadami	Fukushima	Tohoku
32	Hap_018	A2	TMP_NY457	LC581698	Tadami	Fukushima	Tohoku
33	Hap_020	A2	TMP_NY1289	LC581722	Tadami	Fukushima	Tohoku
33	Hap_060	A3	TMP_NY1290	LC581700	Tadami	Fukushima	Tohoku
34	Hap_048	A2	TMP_NY2143	LC581730	Tadami	Fukushima	Tohoku
34	Hap_031	A3	TMP_NY2144	LC581731	Tadami	Fukushima	Tohoku
35	Hap_021	A2	TMP_NY29	LC581725	Tadami	Fukushima	Tohoku
35	Hap_028	A2	TMP_NY1	LC581705	Tadami	Fukushima	Tohoku
35	Hap_030 (2)	A2	TMP_NY30	LC581726	Tadami	Fukushima	Tohoku
35	Hap_049	A3	TMP_NY48	LC581727	Tadami	Fukushima	Tohoku
35	Hap_050 (1)	A3	TMP_NY50	LC581729	Tadami	Fukushima	Tohoku
35	Hap_056	A3	TMP_NY49	LC581728	Tadami	Fukushima	Tohoku
35	Hap_062 (1)	A3	TMP_NY28	LC581723	Tadami	Fukushima	Tohoku
35	Hap_062 (2)	A3	TMP_NY36	LC581724	Tadami	Fukushima	Tohoku
36	Hap_035	A2	4017	LC581712	Nikko	Tochigi	Kanto
37	Hap_034	A2	45058	LC581665	Nikko	Tochigi	Kanto
38	Hap_041	A2	TMP_NY211	LC581695	Kanuma	Tochigi	Kanto
39	Hap_037 (1)	A2	TMP_20140423-5	LC581513	Sano	Tochigi	Kanto
40	Hap_039 (1)	A2	43354	LC581684	Minakami	Gunma	Kanto
40	Hap_062 (3)	A3	43353	LC581628	Minakami	Gunma	Kanto
41	Hap_038	A2	3236	LC581738	Mito	Ibaraki	Kanto
42	Hap_037 (2)	A2	TMP_NY372	LC581692	Tsukuba	Ibaraki	Kanto
43	Hap_036	A2	4063	LC581630	Tsuchiura	Ibaraki	Kanto
43	Hap_042	A2	4065	LC581689	Tsuchiura	Ibaraki	Kanto
44	Hap_039 (2)	A2	29976	LC581653	Niijima	Tokyo	Kanto
45	Hap_039 (3)	A2	21851	LC581652	Kouzushima	Tokyo	Kanto
46	Hap_063	A3	59328	LC581670	Asasahikawa	Hokkaido	Hokkaido
47	Hap_069 (1)	A3	43568	LC581669	Ebetsu	Hokkaido	Hokkaido
48	Hap_062 (4)	A3	45062	LC581633	Fukushima	Fukushima	Tohoku
49	Hap_050 (2)	A3	TMP_NY2714	LC581702	Tadami	Fukushima	Tohoku
50	Hap_061	A3	TMP_NY2713	LC581701	Tadami	Fukushima	Tohoku
51	Hap_062 (5)	A3	56048	LC581611	Minamiuonuma	Niigata	Chubu
52	Hap_059	A3	TMP_TS320	LC581690	Joetsu	Niigata	Chubu
53	Hap_057	A3	30687	LC581679	Itoigawa	Niigata	Chubu
54	Hap_058	A3	30677	LC581610	Itoigawa	Niigata	Chubu
55	Hap_088	A3	46513	LC581620	Nagano	Nagano	Chubu
56	Hap_052	A3	22929	LC581715	Naganohara	Gunma	Kanto
57	Hap_051	A3	55120	LC581623	Karuizawa	Nagano	Chubu
58	Hap_065 (1)	A3	3301	LC581745	Tatebayashi	Gunma	Kanto
59	Hap_044	A3	3813	LC581747	Fujimino	Saitama	Kanto
60	Hap_043	A3	3189	LC581749	Tokorozawa	Saitama	Kanto
60	Hap_065 (2)	A3	3175	LC581748	Tokorozawa	Saitama	Kanto
61	Hap_053 (1)	A3	46584	LC581757	Itabashi	Tokyo	Kanto
62	Hap_045	A3	36924	LC581676	Narashino	Chiba	Kanto
63	Hap_046	A3	46176	LC581629	Ichihara	Chiba	Kanto
64	Hap_047 (1)	A3	60025	LC581718	Yokohama	Kanagawa	Kanto
65	Hap_067	A3	46298	LC581627	Machida	Tokyo	Kanto
66	Hap_053 (2)	A3	3981	LC581742	Sagamihara	Kanagawa	Kanto
67	Hap_092	A3	33239	LC581560	Oshima	Mie	Kinki
67	Hap_101	A3	56760	LC581711	Oshima	Tokyo	Kanto
67	Hap_135	B1	32002	LC581626	Oshima	Tokyo	Kanto
68	Hap_047 (2)	A3	TMP_HA-B-1	LC581741	Hachijo	Tokyo	Kanto
69	Hap_068 (1)	A3	TMP_MY140508-1	LC581737	Yamanashi	Yamanashi	Chubu
70	Hap_068 (2)	A3	58953	LC581625	Minobu	Yamanashi	Chubu
71	Hap_050 (3)	A3	59383	LC581631	Shizuoka	Shizuoka	Chubu
72	Hap_069 (2)	A3	32662	LC581619	Ina	Nagano	Chubu
73	Hap_079	A3	49583	LC581622	Ina	Nagano	Chubu
74	Hap_050 (4)	A3	26572	LC581618	Kiso	Nagano	Chubu
75	Hap_080	A3	24414	LC581621	Nakatsugawa	Gifu	Chubu
76	Hap_084	A3	32020	LC581562	Shitara	Aichi	Chubu
77	Hap_050 (5)	A3	55199	LC581601	Toei	Aichi	Chubu
78	Hap_050 (6)	A3	36750	LC581599	Shinshiro	Aichi	Chubu
79	Hap_074	A3	42071	LC581602	Takayama	Gifu	Chubu
80	Hap_090	A3	UN	LC581683	Suzu	Ishikawa	Chubu
81	Hap_076	A3	TMP_T3061	LC581590	Nanto	Toyama	Chubu
82	Hap_089	A3	TMP_S556	LC581608	Nanto	Toyama	Chubu
83	Hap_087	A3	13226	LC581609	Nanto	Toyama	Chubu
84	Hap_068 (3)	A3	36670	LC581588	Kanazawa	Ishikawa	Chubu
85	Hap_054	A3	28804	LC581607	Kanazawa	Ishikawa	Chubu
86	Hap_068 (4)	A3	55735	LC581605	Shirakawa	Gifu	Chubu
87	Hap_068 (5)	A3	33038	LC581587	Hakusan	Ishikawa	Chubu
88	Hap_072 (1)	A3	56769	LC581606	Hakusan	Ishikawa	Chubu
89	Hap_085	A3	49465	LC581589	Hakusan	Ishikawa	Chubu
90	Hap_086	A3	56072	LC581582	Katsuyama	Fukui	Chubu
91	Hap_072 (2)	A3	39854	LC581600	Inuyama	Aichi	Chubu
92	Hap_071	A3	TMP_T3600	LC581604	Tajimi	Gifu	Chubu
93	Hap_064	A3	14561	LC581598	Kounan	Aichi	Chubu
94	Hap_066	A3	TMP_TS1827	LC581691	Tahara	Aichi	Chubu
95	Hap_078	A3	16178	LC581649	Kuwana	Mie	Kinki
96	Hap_073	A3	40438	LC581596	Ikeda	Fukui	Chubu
96	Hap_170	torrenticola	40440	LC581581	Ikeda	Fukui	Chubu
97	Hap_070	A3	33504	LC581595	Echizen	Fukui	Chubu
98	Hap_055	A3	28711	LC581743	Ibigawa	Gifu	Chubu
99	Hap_100	A3	42147	LC581603	Ibigawa	Gifu	Chubu
100	Hap_072 (3)	A3	36533	LC581592	Ogaki	Gifu	Chubu
101	Hap_094 (1)	A3	45949	LC581597	Tsuruga	Fukui	Chubu
102	Hap_082	A3	41497	LC581593	Nagahama	Shiga	Kinki
103	Hap_094 (2)	A3	40384	LC581594	Takashima	Shiga	Kinki
104	Hap_068 (6)	A3	59527	LC581614	Otsu	Shiga	Kinki
105	Hap_068 (7)	A3	59625	LC581617	Takashima	Shiga	Kinki
106	Hap_075	A3	59624	LC581616	Nantan	Kyoto	Kinki
106	Hap_120 (1)	B1	59076	LC581533	Nantan	Kyoto	Kinki
106	Hap_178	torrenticola	32681	LC581574	Nantan	Kyoto	Kinki
107	Hap_098	A3	58939	LC581522	Kyoto	Kyoto	Kinki
108	Hap_068 (8)	A3	48045	LC581525	Kyoto	Kyoto	Kinki
108	Hap_068 (9)	A3	59593	LC581526	Kyoto	Kyoto	Kinki
109	Hap_094 (3)	A3	57793	LC581529	Kyoto	Kyoto	Kinki
110	Hap_095	A3	59043	LC581523	Kyoto	Kyoto	Kinki
111	Hap_077	A3	34845	LC581650	Koka	Shiga	Kinki
112	Hap_096 (1)	A3	39945	LC581548	Koka	Shiga	Kinki
113	Hap_099	A3	59594	LC581615	Ujitawara	Kyoto	Kinki
114	Hap_083	A3	27791	LC581559	Iga	Mie	Kinki
115	Hap_096 (2)	A3	TMP_T3347	LC581561	Matsusaka	Mie	Kinki
116	Hap_091 (1)	A3	27790	LC581558	Nabari	Mie	Kinki
117	Hap_091 (2)	A3	25525	LC581551	Uda	Nara	Kinki
118	Hap_091 (3)	A3	25552	LC581552	Uda	Nara	Kinki
119	Hap_093	A3	29388	LC581553	Totsukawa	Nara	Kinki
120	Hap_097	A3	59641	LC581654	Tanabe	Wakayama	Kinki
121	Hap_081	A3	59642	LC581655	Tanabe	Wakayama	Kinki
122	Hap_107 (1)	B1	TMP_20140617-9	LC581681	Suginami	Tokyo	Kanto
123	Hap_138 (1)	B1	32712	LC581680	Chiyoda	Tokyo	Kanto
124	Hap_138 (2)	B1	TMP_NY1684	LC581694	Koto	Tokyo	Kanto
125	Hap_102	B1	28921	LC581515	Atsugi	Kanagawa	Kanto
126	Hap_120 (2)	B1	57792	LC581531	Kyoto	Kyoto	Kinki
127	Hap_114 (1)	B1	59047	LC581527	Kyoto	Kyoto	Kinki
128	Hap_114 (2)	B1	58938	LC581567	Otsu	Shiga	Kinki
129	Hap_118	B1	56161	LC581524	Kyoto	Kyoto	Kinki
130	Hap_108	B1	47011	LC581528	Kameoka	Kyoto	Kinki
131	Hap_106	B1	UN	LC581687	Mino	Osaka	Kinki
132	Hap_109 (1)	B1	3687	LC581550	Gose	Nara	Kinki
133	Hap_109 (2)	B1	24065	LC581554	Izumi	Osaka	Kinki
134	Hap_107 (2)	B1	24521	LC581555	Hannan	Osaka	Kinki
135	Hap_136	B1	42180	LC581556	Hidakagawa	Wakayama	Kinki
136	Hap_104	B1	59381	LC581656	Shirahama	Wakayama	Kinki
136	Hap_137	B1	TMP_20140423-2	LC581675	Shirahama	Wakayama	Kinki
137	Hap_103	B1	58940	LC581557	Kozagawa	Wakayama	Kinki
138	Hap_121	B1	44246	LC581530	Kyotamba	Kyoto	Kinki
139	Hap_119 (1)	B1	59522	LC581612	Ayabe	Kyoto	Kinki
140	Hap_119 (2)	B1	59523	LC581613	Fukuchiyama	Kyoto	Kinki
141	Hap_123	B1	55655	LC581532	Ine	Kyoto	Kinki
142	Hap_122	B1	TMP_T3294	LC581591	Toyooka	Hyogo	Kinki
143	Hap_116	B1	36832	LC581541	Mimasaka	Okayama	Chugoku
144	Hap_117	B1	36471	LC581546	Sayo	Hyogo	Kinki
145	Hap_115 (1)	B1	44459	LC581547	Kamigori	Hyogo	Kinki
146	Hap_115 (2)	B1	30055	LC581545	Awaji	Hyogo	Kinki
147	Hap_130 (1)	B1	37045	LC581542	Kagamino	Okayama	Chugoku
148	Hap_134	B1	TMP_20140423-3	LC581543	Kibichuo	Okayama	Chugoku
149	Hap_132	B1	TMP_20140423-4	LC581544	Takahashi	Okayama	Chugoku
150	Hap_129	B1	36833	LC581540	Daisen	Tottori	Chugoku
151	Hap_125 (1)	B1	46529	LC581539	Izumo	Shimane	Chugoku
152	Hap_126	B1	48111	LC581538	Unnan	Shimane	Chugoku
153	Hap_125 (2)	B1	59644	LC581624	Akitakata	Hiroshima	Chugoku
154	Hap_128	B1	47276	LC581537	Akiota	Hiroshima	Chugoku
155	Hap_127	B1	42978	LC581536	Hatsukaichi	Hiroshima	Chugoku
156	Hap_105	B1	3430	LC581746	Hatsukaichi	Hiroshima	Chugoku
157	Hap_130 (2)	B1	60509	LC581753	Iwakuni	Yamaguchi	Chugoku
158	Hap_112	B1	60444	LC581750	Hagi	Yamaguchi	Chugoku
159	Hap_124 (1)	B1	38739	LC581534	Hagi	Yamaguchi	Chugoku
159	Hap_124 (2)	B1	60494	LC581535	Hagi	Yamaguchi	Chugoku
160	Hap_139 (1)	B1	30833	LC581668	Anan	Tokushima	Shikoku
161	Hap_139 (2)	B1	22348	LC581648	Kamiyama	Tokushima	Shikoku
162	Hap_113	B1	3186	LC581740	Takamatsu	Kagawa	Shikoku
163	Hap_133	B1	40176	LC581520	Ino	Kochi	Shikoku
164	Hap_140	B1	TMP_20130515-2	LC581518	Nakatosa	Kochi	Shikoku
165	Hap_111	B1	60495	LC581751	Yanai	Yamaguchi	Chugoku
166	Hap_131	B1	TMP_20140519-1	LC581685	Yawatahama	Ehime	Shikoku
167	Hap_110	B1	30658	LC581519	Tosashimizu	Kochi	Shikoku
168	Hap_151	B2	60501	LC581752	Nagato,	Yamaguchi	Chugoku
169	Hap_153	B2	59946	LC581719	Shimonoseki	Yamaguchi	Chugoku
169	Hap_156 (1)	B2	59947	LC581720	Shimonoseki	Yamaguchi	Chugoku
169	Hap_160	B2	59945	LC581716	Shimonoseki	Yamaguchi	Chugoku
170	Hap_150	B2	27809	LC581736	Kitakyushu	Fukuoka	Kyushu
171	Hap_149	B2	TMP_KE0364	LC581667	Kitakyushu	Fukuoka	Kyushu
172	Hap_145	B2	TMP_S906	LC581645	Kunisaki	Oita	Kyushu
173	Hap_155	B2	29252	LC581647	Kama	Fukuoka	Kyushu
174	Hap_144	B2	TMP_KPC319	LC581717	Iki	Nagasaki	Kyushu
175	Hap_147	B2	33214	LC581646	Karatsu	Saga	Kyushu
176	Hap_161	B2	24427	LC581516	Tara	Saga	Kyushu
177	Hap_156 (2)	B2	TMP_NY1703	LC581721	Nagasaki	Nagasaki	Kyushu
178	Hap_143	B2	45171	LC581517	Shinkamigoto	Nagasaki	Kyushu
179	Hap_148	B2	47012	LC581639	Goto	Nagasaki	Kyushu
180	Hap_146	B2	TMP_120229-4	LC581754	Goto	Nagasaki	Kyushu
181	Hap_141	B2	3820	LC581739	Bungoono	Oita	Kyushu
182	Hap_154	B2	24067	LC581643	Takachiho	Miyazaki	Kyushu
183	Hap_152	B2	59659	LC581682	Mashiki	Kumamoto	Kyushu
184	Hap_163	B2	3929	LC581744	Amakusa	Kumamoto	Kyushu
185	Hap_164	B2	TMP_19890812	LC581644	Amakusa	Kumamoto	Kyushu
186	Hap_162	B2	27681	LC581734	Kobayashi	Miyazaki	Kyushu
187	Hap_157	B2	19033	LC581688	Miyazaki	Miyazaki	Kyushu
188	Hap_166	B2	32078	LC581642	Kanoya	Kagoshima	Kyushu
189	Hap_165	B2	45485	LC581755	Minamiosumi	Kagoshima	Kyushu
190	Hap_159	B2	UN	LC581666	Satsumasendai	Kagoshima	Kyushu
191	Hap_142	B2	45123	LC581641	Nishinoomote	Kagoshima	Kyushu
192	Hap_158 (1)	B2	56563	LC581672	Yakushima	Kagoshima	Kyushu
193	Hap_158 (2)	B2	32014	LC581671	Yakushima	Kagoshima	Kyushu
194	Hap_173	torrenticola	TMP_20130729-1	LC581714	Gujo	Gifu	Chubu
195	Hap_172 (1)	torrenticola	40364	LC581580	Ikeda	Fukui	Chubu
196	Hap_176	torrenticola	26657	LC581583	Ibigawa	Gifu	Chubu
197	Hap_172 (2)	torrenticola	44509	LC581586	Motosu	Gifu	Chubu
198	Hap_172 (3)	torrenticola	36024	LC581585	Ibigawa	Gifu	Chubu
199	Hap_177	torrenticola	34648	LC581584	Ibigawa	Gifu	Chubu
200	Hap_172 (4)	torrenticola	TMP_T3736	LC581549	Takashima	Shiga	Kinki
201	Hap_175	torrenticola	31959	LC581565	Higashiomi	Shiga	Kinki
202	Hap_174	torrenticola	34976	LC581564	Higashiomi	Shiga	Kinki
203	Hap_171 (1)	torrenticola	56747	LC581566	Takashima	Shiga	Kinki
204	Hap_171 (2)	torrenticola	3586	LC581563	Otsu	Shiga	Kinki
205	Hap_171 (3)	torrenticola	24066	LC581573	Kyoto	Kyoto	Kinki
206	Hap_185	torrenticola	43390	LC581579	Tsu	Mie	Kinki
207	Hap_184	torrenticola	27085	LC581577	Matsusaka	Mie	Kinki
208	Hap_167 (1)	torrenticola	43385	LC581578	Odai	Mie	Kinki
209	Hap_167 (2)	torrenticola	36890	LC581569	Kamikitayama	Nara	Kinki
209	Hap_181	torrenticola	TMP_S1090	LC581521	Kamikitayama	Nara	Kinki
210	Hap_169	torrenticola	43391	LC581571	Kamikitayama	Nara	Kinki
211	Hap_179	torrenticola	41016	LC581570	Tenkawa	Nara	Kinki
212	Hap_183	torrenticola	36644	LC581568	Shimokitayama	Nara	Kinki
213	Hap_168	torrenticola	28564	LC581572	Tanabe	Wakayama	Kinki
213	Hap_180	torrenticola	58941	LC581576	Tanabe	Wakayama	Kinki
214	Hap_182	torrenticola	56750	LC581575	Tanabe	Wakayama	Kinki
OUTGROUP		g. miyakonis	32507	LC581673	Miyako Isl.	Okinawa
OUTGROUP		g. gargarizans	4093	LC581677	Sakhalin		Russia
OUTGROUP		g. gargarizans	4119	LC581678	Khabarovsk		Russia
OUTGROUP		g. gargarizans	26598	LC581674			South Korea
OUTGROUP		bankorensis	46294	LC581756	Taichung		Taiwan
