# Supplementary material for: Genetic diversity and demography of Bufo japonicus and B. torrenticola (Amphibia: Anura: Bufonidae) influenced by the Quaternary climate
Source: PeerJ. 2022 Jun 8;10:e13452. doi: 10.7717/peerj.13452 (PMC9188313; doi:10.7717/peerj.13452)
Supplement: Supplemental Information 6 — We assigned the records for B. japonicus into the lineages obtained in phylogenetic analyses based on their locations. [file peerj-10-13452-s006.xlsx]

## Sheet: Sheet1
lineage	Latitude	Longitude
A1	41.31	141.09
A1	41.13	140.34
A1	41.44	140.87
A1	41.26	141.4
A1	40.53	140.26
A1	40.71	140.6
A1	40.62	140.34
A1	40.6	140.95
A1	40.58	140.28
A1	41.34	141.06
A1	41.05	140.63
A1	40.52	140.19
A1	40.06	140.64
A1	40.01	140.8
A1	39.98	140.43
A1	39.77	140.76
A1	39.8	140.78
A1	39.77	140.8
A1	39.79	140.77
A1	39.34	141.68
A1	39.31	140.89
A1	39.29	141.8
A1	39.84	141.04
A1	38.96	140.79
A1	39.12	140.92
A1	39.9	140.89
A1	39.72	140.8
A1	39.13	140.07
A1	39.05	139.99
A1	38.78	139.77
A1	39.07	140.05
A1	38.56	140.01
A2	36.55	139.45
A2	36.08	140.19
A2	36.93	140.27
A2	37.2	140.25
A2	37.32	139.65
A2	38.41	140.71
A2	38.1	139.96
A2	37.81	139.98
A2	39.15	139.97
A2	37.87	139.96
A2	38.04	140.48
A2	37.47	139.98
A2	37.52	140.2
A2	37.66	140.01
A2	37.57	140.3
A2	36.75	139.42
A2	36.72	138.89
A2	37.44	140.17
A2	36.08	140.2
A2	36.23	140.08
A2	36.6	139.61
A2	37.3	140.7
A2	37.54	140.2
A2	37.32	139.38
A2	37.41	139.3
A2	37.36	140.68
A2	37.57	139.6
A2	37.91	139.68
A2	36.79	139.54
A2	37.55	140.18
A2	37.32	139.35
A2	37.04	139.38
A2	36.39	140.41
A2	38.47	140.1
A2	36.92	139.75
A2	36.05	140.12
A2	37.87	139.98
A2	36.19	140.15
A2	36.89	140.62
A2	36.73	140.08
A3	35.26	140.15
A3	35.68	140.02
A3	35.25	140.13
A3	36.71	138.89
A3	36.56	138.64
A3	36.24	139.54
A3	36.7	138.53
A3	36.69	138.52
A3	35.87	139.52
A3	35.81	139.44
A3	35.84	139.42
A3	35.59	139.41
A3	35.8	139.69
A3	35.44	138.54
A3	35.75	138.76
A3	35.78	138.69
A3	35.75	138.57
A3	35.33	138.38
A3	35.46	138.51
A3	35.5	138.4
A3	35.71	138.83
A3	35.64	138.82
A3	35.69	139.02
A3	35.65	138.85
A3	35.68	138.83
A3	35.53	138.45
A3	35.56	139.57
A3	35.58	139.28
A3	34.79	138.91
A3	34.79	138.9
A3	34.83	138.93
A3	34.81	138.87
A3	35.11	137.82
A3	35.21	137.59
A3	35.07	137.78
A3	35.13	137.84
A3	35.2	137.88
A3	35.23	137.9
A3	35.07	138.21
A3	35.21	137.89
A3	34.85	137.78
A3	35.25	137.9
A3	35.84	137.69
A3	35.79	138.08
A3	36.38	137.84
A3	36.74	138.08
A3	35.82	137.86
A3	36.37	138.6
A3	36.31	137.79
A3	36.62	137.97
A3	36.15	138.14
A3	36.06	138.27
A3	35.89	138.21
A3	35.97	138.32
A3	35.65	137.66
A3	36.18	138.3
A3	36.79	138.11
A3	35.84	137.74
A3	36.12	137.87
A3	36.47	137.03
A3	36.48	136.98
A3	36.48	136.93
A3	36.77	137.54
A3	36.51	137.09
A3	36.38	137.02
A3	36.28	136.69
A3	36.47	136.71
A3	36.16	136.6
A3	36.14	136.78
A3	36.47	136.67
A3	36.31	136.65
A3	36.22	136.74
A3	36.2	136.76
A3	36.14	136.76
A3	36.11	136.72
A3	36.1	136.72
A3	36.57	136.67
A3	36.13	136.74
A3	36.27	137.4
A3	35.4	136.46
A3	36.27	136.94
A3	35.32	137.06
A3	36.24	136.85
A3	35.44	137.6
A3	35.67	136.5
A3	36.37	137.37
A3	36.12	137.32
A3	35.6	136.41
A3	36.38	137.36
A3	35.1	137.57
A3	35.33	136.87
A3	34.98	137.58
A3	35.35	137.02
A3	35.06	137.25
A3	35.05	137.72
A3	34.61	137.12
A3	34.65	137.23
A3	35.14	136.97
A3	34.98	137.42
A3	35.13	137.56
A3	35.14	137.31
A3	35.09	137.2
A3	35.01	137.44
A3	34.8	137.47
A3	35.01	137.38
A3	34.67	137.24
A3	35.03	137.4
A3	35.03	136.98
A3	35.13	136.9
A3	35.19	137.26
A3	35.12	137.28
A3	34.61	136.1
A3	34.77	136.13
A3	34.6	136.07
A3	34.51	136.41
A3	35.13	136.64
A3	34.85	136.38
A3	34.56	136.08
A3	33.97	135.56
A3	33.74	135.59
A3	34.54	136.04
A3	34.47	136.03
A3	33.99	135.79
A3	34.87	136.04
A3	35.24	136.38
A3	35.54	136.21
A3	35.5	136.07
A3	34.97	136.17
A3	34.97	136.19
A3	35.27	136.35
A3	35.01	136.3
A3	35.35	135.78
A3	34.96	135.86
A3	35.05	135.69
A3	35.12	135.77
A3	35.07	135.79
A3	35.04	135.8
A3	35.12	135.71
A3	35.03	135.66
A3	34.97	135.85
A3	35.26	135.96
A3	34.83	135.9
A3	35.34	135.73
A3	35.14	135.71
A3	35.25	135.91
A3	35.14	135.75
A3	35.11	135.72
A3	35.12	135.73
A3	35.13	135.72
A3	35.18	135.9
A3	35.06	135.82
A3	35.02	135.81
A3	34.86	135.88
A3	35.23	135.78
A3	35.32	135.69
A3	35.31	135.69
A3	35.11	135.68
A3	35.02	135.8
A3	35.1	135.81
A3	37.03	138.03
A3	36.91	138.96
A3	37.14	138.19
A3	37.11	138
A3	36.08	136.61
A3	35.9	136.17
A3	35.93	136.38
A3	35.61	136.03
A3	37.75	140.25
A3	37.32	139.35
A3	37.32	139.27
A3	37.35	139.52
A3	37.35	139.49
A3	37.04	139.38
B1	33.2	132.61
B1	33.47	132.99
B1	33.51	134.12
B1	33.56	133.9
B1	33.67	132.97
B1	33.67	133.51
B1	33.73	133.1
B1	33.76	133.76
B1	33.77	133.12
B1	33.77	132.98
B1	33.78	133.23
B1	33.81	134.36
B1	33.81	133.27
B1	33.83	133.82
B1	33.83	133.86
B1	33.84	133.88
B1	33.85	133.58
B1	33.87	134.08
B1	33.89	133.95
B1	33.91	133.78
B1	33.91	133.99
B1	33.91	134.19
B1	33.93	134.31
B1	33.95	134.26
B1	33.95	134.21
B1	33.96	134.04
B1	33.96	134.46
B1	33.96	132.66
B1	33.96	134.08
B1	34.06	131.68
B1	34.32	131.54
B1	34.35	135.4
B1	34.37	135.43
B1	34.39	133.77
B1	34.39	135.64
B1	34.4	135.67
B1	34.42	131.76
B1	34.43	132.01
B1	34.48	131.82
B1	34.51	131.55
B1	34.55	131.58
B1	34.58	135.01
B1	34.78	135.33
B1	34.78	131.14
B1	34.82	135.23
B1	34.85	135.48
B1	34.85	133.97
B1	34.87	135.47
B1	34.89	135.31
B1	34.93	135.48
B1	34.94	135.57
B1	34.96	134.35
B1	35.01	134.65
B1	35.02	135.61
B1	35.03	135.64
B1	35.03	135.8
B1	35.06	135.23
B1	35.09	135.76
B1	35.1	135.68
B1	35.12	135.59
B1	35.12	135.71
B1	35.14	135.72
B1	35.15	133.81
B1	35.16	133.18
B1	35.17	135.78
B1	35.18	134.12
B1	35.18	135.9
B1	35.18	134.09
B1	35.2	134.85
B1	35.21	133.8
B1	35.21	135.43
B1	35.24	133.98
B1	35.25	134.12
B1	35.26	133.58
B1	35.27	135.71
B1	35.3	133.63
B1	35.31	135.69
B1	35.32	135.69
B1	35.33	133.99
B1	35.38	135.36
B1	35.45	135.03
B1	35.45	134.66
B1	35.45	135.11
B1	35.48	134.67
B1	35.56	134.34
B1	35.71	135.24
B1	34.76	131.15
B1	34.24	131.5
B1	34.2	131.99
B1	34.47	132.08
B1	34.48	132.14
B1	34.6	132.18
B1	33.79	132.25
B1	33.53	132.41
B1	34.64	132.62
B1	35.32	132.73
B1	35.13	132.9
B1	32.73	133.01
B1	33.3	133.24
B1	33.81	133.26
B1	35.47	133.48
B1	34.9	133.71
B1	34.86	133.81
B1	35.28	133.88
B1	34.4	134.05
B1	33.97	134.35
B1	35.15	134.36
B1	35.1	134.36
B1	34.92	134.39
B1	35.51	134.71
B1	33.85	134.81
B1	34.52	134.99
B1	33.93	135.2
B1	34.33	135.21
B1	35.27	135.22
B1	35.7	135.23
B1	34.86	135.48
B1	34.4	135.5
B1	33.66	135.54
B1	34.99	135.61
B1	34.42	135.67
B1	33.56	135.69
B1	35.31	135.71
B1	35.09	135.79
B1	35.05	135.82
B1	34.98	135.86
B2	30.29	130.44
B2	31.07	130.74
B2	31.2	130.87
B2	31.57	130.54
B2	31.88	130.98
B2	31.96	130.36
B2	31.98	130.37
B2	32.58	131.12
B2	32.77	130.86
B2	32.78	131.39
B2	32.79	130.22
B2	32.82	131.55
B2	32.83	131.39
B2	32.84	128.94
B2	32.98	129.14
B2	33	129.07
B2	33.15	129.92
B2	33.15	130.04
B2	33.16	129.94
B2	33.21	131.44
B2	33.38	130.21
B2	33.46	130.79
B2	34.17	131.51
B2	34.25	131.32
B2	34.31	130.98
B2	34.33	131.69
B2	34.36	131.15
B2	32.93	129.05
B2	33.78	129.7
B2	32.8	129.79
B2	31.83	129.89
B2	32.37	130.02
B2	33.36	130.07
B2	32.98	130.09
B2	32.59	130.43
B2	30.45	130.48
B2	30.31	130.51
B2	33.48	130.73
B2	33.9	130.8
B2	31.09	130.83
B2	32.8	130.85
B2	31.49	130.87
B2	33.86	130.9
B2	30.66	131
B2	32.06	131.08
B2	34.27	131.12
B2	34.37	131.13
B2	31.77	131.27
B2	32.76	131.38
B2	32.89	131.43
B2	33.58	131.6
Bufo torrenticola	34.05	135.78
Bufo torrenticola	35.19	135.86
Bufo torrenticola	34.06	135.55
Bufo torrenticola	33.99	135.56
Bufo torrenticola	34.06	135.57
Bufo torrenticola	35.34	135.72
Bufo torrenticola	35.24	135.83
Bufo torrenticola	35.24	135.89
Bufo torrenticola	35.31	135.89
Bufo torrenticola	34.18	135.9
Bufo torrenticola	34.1	135.94
Bufo torrenticola	34.18	136.03
Bufo torrenticola	35.51	136.04
Bufo torrenticola	34.18	136.1
Bufo torrenticola	34.28	136.2
Bufo torrenticola	34.45	136.21
Bufo torrenticola	34.53	136.22
Bufo torrenticola	35.09	136.35
Bufo torrenticola	35.94	136.36
Bufo torrenticola	35.93	136.38
Bufo torrenticola	35.14	136.38
Bufo torrenticola	35.76	136.44
Bufo torrenticola	35.64	136.45
Bufo torrenticola	35.59	136.46
Bufo torrenticola	35.65	136.6
Bufo torrenticola	35.77	136.97
